# Supplementary material
Source: PubMed Central journal article supplement (PMC9018890)
Supplement: NIHMS1774160-supplement-1.pdf [file NIHMS1774160-supplement-1.pdf]

**Supplemental Table 1:** Nephrotoxic medications used to define the number of nephrotoxin medication days

**Aminoglycosides**

Amikacin  
Gentamicin  
Kanamycin  
Neomycin

**Amphotericin**

Amphotericin b

**Calcineurin Inhibitors**

Tacrolimus

**Angiotensin II Receptor Blocker/  
Angiotensin Converting Enzyme  
Inhibitor**

Benazepril  
Captopril  
Enalapril  
Irbesartan  
Lisinopril  
Losartan  
Valsartan

**Nonsteroidal Anti-Inflammatory Drugs**

Aspirin  
Ibuprofen  
Naproxen  
Ketorolac

**Vancomycin**

**Piperacillin/Tazobactam**

**Diuretics**

Amiloride  
Furosemide  
Hydrochlorothiazide  
Spironolactone

**Antivirals**

Acyclovir  
Cidofovir  
Ganciclovir  
Valacyclovir  
Valganciclovir

Supplemental Table 2: Comparison of the incidence of AKI based on KDIGO defining criteria

| <b>Transplant type</b>         | <b>AKI Defined by Serum Creatinine or Urine Output</b> | <b>AKI Defined by Serum Creatinine</b> | <b>AKI Defined by Urine Output</b> |
|--------------------------------|--------------------------------------------------------|----------------------------------------|------------------------------------|
| <b>All transplant patients</b> | 186 (55.0%)                                            | 175 (51.8%)                            | 35 (10.4%)                         |
| <b>Liver</b>                   | 90 (45.2%)                                             | 86 (43.2%)                             | 17 (8.5%)                          |
| <b>Heart</b>                   | 64 (73.6%)                                             | 62 (71.3%)                             | 11 (12.6%)                         |
| <b>Multivisceral</b>           | 10 (52.6%)                                             | 7 (36.8%)                              | 3 (15.8%)                          |
| <b>Intestine</b>               | 8 (61.5%)                                              | 7 (53.8%)                              | 2 (15.4%)                          |
| <b>Lung</b>                    | 12 (70.6%)                                             | 12 (70.6%)                             | 1 (5.9%)                           |
| <b>Heart-Lung</b>              | 2 (66.7%)                                              | 1 (33.3%)                              | 1 (33.3%)                          |

Abbreviations: *AKI* Acute Kidney Disease, *KDIGO* Kidney Disease Improving Global Outcomes

Supplemental Table 3: Univariable logistic regression of risk factors for acute kidney injury compared to those without acute kidney injury in all transplant patients

| <b>Characteristic</b>         | <b>OR (95% CI)</b> | <b>P-Value</b> |
|-------------------------------|--------------------|----------------|
| Age                           | 1.01 (1.00-1.01)   | <0.01          |
| Sex                           | 1.09 (0.71-1.67)   | 0.69           |
| Race                          | 0.73 (0.39-1.36)   | 0.33           |
| e-PELOD-2 Predicted Mortality | 6.93 (1.59-30.27)  | 0.01           |
| Nephrotoxin Medication Days   | 1.54 (1.32-1.82)   | <0.01          |

Abbreviations: e-*PELOD*-2 electronic Pediatric Logistic Organ Dysfunction-2

Supplemental Table 4: Univariable logistic regression of risk factors for acute kidney disease compared to those without acute kidney disease in all transplant patients

| <b>Characteristic</b> | <b>OR (95% CI)</b> | <b>P-Value</b> |
|-----------------------|--------------------|----------------|
| Age                   | 1.01 (1.00-1.01)   | 0.01           |
| Sex                   | 0.95 (0.50-1.78)   | 0.87           |
| Race                  | 2.32 (1.08-5.01)   | 0.03           |
| Acute Kidney Injury   |                    |                |
| Stage 1               | 2.71 (1.11-6.62)   | 0.03           |
| Stage 2               | 1.14 (0.40-3.22)   | 0.80           |
| Stage 3               | 5.15 (2.21-11.99)  | <0.01          |

Supplemental Table 5: Univariable logistic regression of risk factors for acute kidney disease compared to those without acute kidney disease in patients after heart transplant

| <b>Characteristic</b> | <b>OR (95% CI)</b> | <b>P-Value</b> |
|-----------------------|--------------------|----------------|
| Age                   | 1.00 (0.99-1.01)   | 0.89           |
| Sex                   | 0.63 (0.23-1.70)   | 0.36           |
| Race                  | 1.79 (0.57-5.61)   | 0.32           |
| Acute Kidney Injury   |                    |                |
| Stage 1               | 1.70 (0.43-6.72)   | 0.45           |
| Stage 2               | 0.38 (0.09-1.53)   | 0.17           |
| Stage 3               | 1.57 (0.37-6.62)   | 0.54           |

Supplemental Table 6: Univariable logistic regression of risk factors for chronic kidney disease compared to those without chronic kidney disease in all transplant patients

| <b>Characteristic</b> | <b>OR (95% CI)</b>  | <b>P-Value</b> |
|-----------------------|---------------------|----------------|
| Age                   | 1.01 (1.00-1.01)    | 0.05           |
| Sex                   | 1.50 (0.68-3.35)    | 0.32           |
| Race                  | 3.10 (1.26-7.62)    | 0.01           |
| Acute Kidney Disease  | 35.00 (13.57-90.30) | <0.01          |
