# Supplementary material
Source: PubMed Central journal article supplement (PMC9018890)

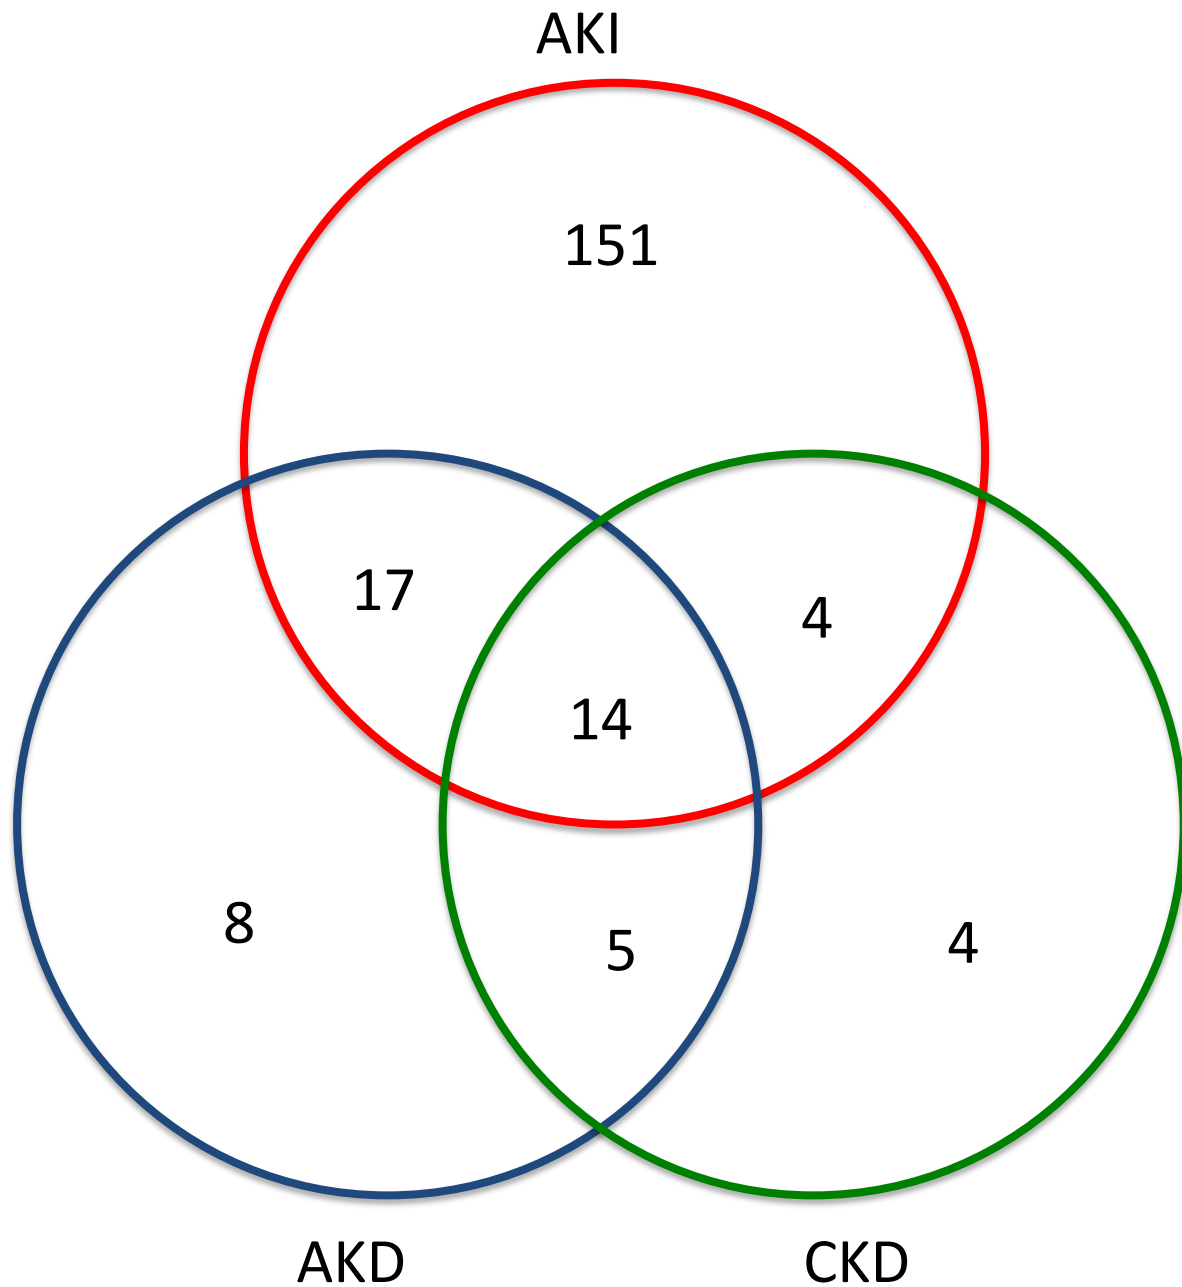

Supplement: NIHMS1774160-supplement-Supplemental_Figure_1.pdf [file NIHMS1774160-supplement-Supplemental_Figure_1.pdf]

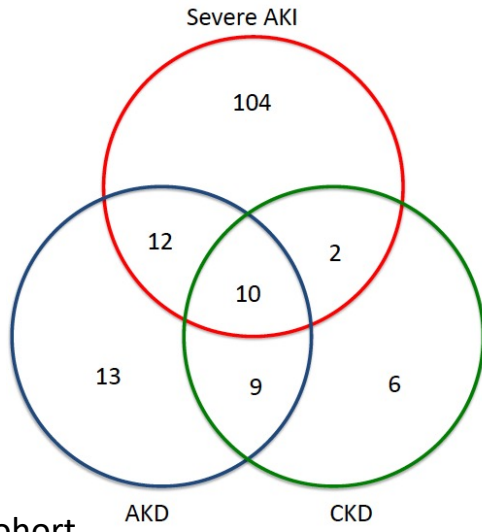

a) Entire Cohort

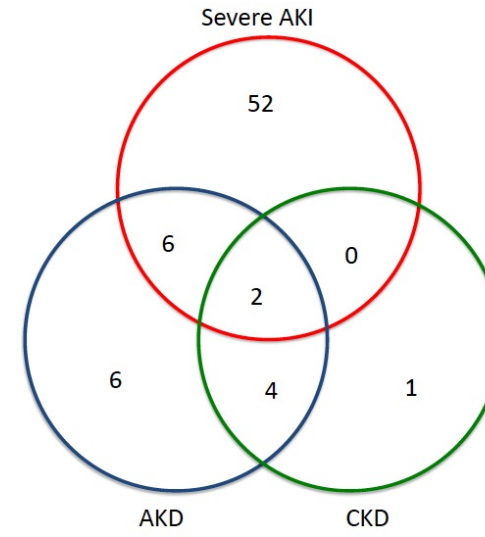

b) Liver

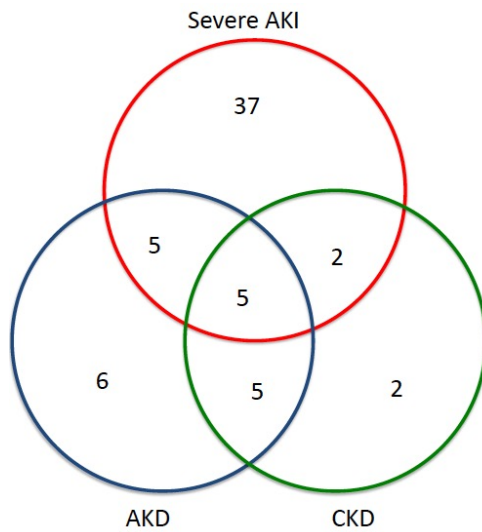

c) Heart

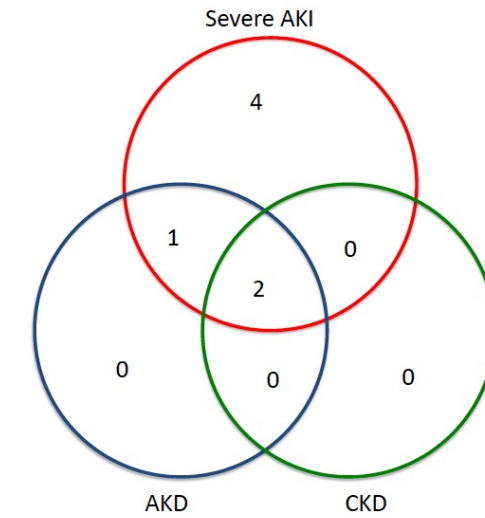

d) Multivisceral

Supplement: NIHMS1774160-supplement-Supplemental_Figure_2.pdf [file NIHMS1774160-supplement-Supplemental_Figure_2.pdf]
